# Supplementary material for: Protein interface classification by evolutionary analysis
Source: PubMed Central journal article supplement (PMC3556496; doi:10.1186/1471-2105-13-334), 2012-12-22
Supplement: 1471-2105-13-334-S1.pdf [file 1471-2105-13-334-S1.pdf]

# Supplementary tables

## Supplementary Table 1: DCxtal dataset

| entry | area    | resolution | xtal interfaces used | evidence                     | reference                                   | comments                                                                                                                                                                                                                                                                                                                                                                                                                                                                                     |
|-------|---------|------------|----------------------|------------------------------|---------------------------------------------|----------------------------------------------------------------------------------------------------------------------------------------------------------------------------------------------------------------------------------------------------------------------------------------------------------------------------------------------------------------------------------------------------------------------------------------------------------------------------------------------|
| 2q7d  | 1783.63 | 1.6        | 1                    | SEC, SLS, comparison to 2odt | 17616525                                    | Monomer. The <a href="#">paper</a> states exactly that "biophysical methods like gel filtration and static light scattering indicate a monomeric state" but data is not shown. The same protein was solved by SGC 2odt and does not have that interface at all. Note that the HIS tag from both chains is involved in interface, however only in part of the rim.                                                                                                                            |
| 2gas  | 1566.9  | 1.6        | 1                    | SEC                          | 16600295                                    | Paper clearly states it is a monomer, they used SEC and show data.                                                                                                                                                                                                                                                                                                                                                                                                                           |
| 3c8y  | 1522.73 | 1.4        | 1                    |                              | 2173950, 2544883                            | Iron hydrogenase 1 from <i>Clostridium pasteurianum</i> . The <a href="#">review</a> says it is a monomer, quoting this <a href="#">paper</a> , but it's not clear what's the evidence there. Anyway all publications after that seem to assume that it is surely a monomer, e.g. <a href="#">9836629</a> which is the primary reference for <a href="#">1feh</a> , same protein as this one solved before. That one contains also the same interface (but it's also the same crystal form). |
| 3mhz  | 1516.29 | 1.7        | 1                    | SEC                          | 20672855,9039918,15243628,17335404, 4966833 | The <a href="#">paper</a> and the (extensive) literature on this PA anthrax protein assume that it is a well-known fact that it is a monomer (82KDa). It's cleaved and the 62KDa part heptamerizes to form a pore. First gel filtration in <a href="#">4966833</a> , established molecular weight of ~ 100 KDa, thus monomer.<br>Entry <a href="#">1t6b</a> is the same protein complexed with a human cell receptor and also contains a large putative crystal interface.                   |
| 2wbq  | 1515.87 | 1.1        | 1                    | SEC                          | 19490124, 15368580                          | No info in paper (though they do mention they did gel filtration), but in a previous paper ( <a href="#">15368580</a> ) characterized as monomer by SEC. Homologous to another protein in this list <a href="#">2og5</a> (30% id with good structural conservation). The interface in both cases is the same one anyway (even though space groups are different).                                                                                                                            |
| 3aap  | 1382.3  | 1.6        | 1                    | SEC                          | 20159467                                    | Monomer. Authors say so in paper, they used SEC but data not shown                                                                                                                                                                                                                                                                                                                                                                                                                           |

|      |         |     |     |                       |                        |                                                                                                                                                                                                                                                                                                                                                                                                                     |
|------|---------|-----|-----|-----------------------|------------------------|---------------------------------------------------------------------------------------------------------------------------------------------------------------------------------------------------------------------------------------------------------------------------------------------------------------------------------------------------------------------------------------------------------------------|
| 2yz1 | 1378.66 | 1.4 | 1   | SEC, AUC              | 18045614               | This ligand binding domain (extracellular domain of a membrane protein) seems to be a monomer in solution as shown by SEC (no data shown) and AUC (sedimentation equilibrium, data shown). As further hint the authors note that the interface is antiparallel and thus unlikely to be formed by a transmembrane protein on a single cell surface. The full length including transmembrane domain could be a dimer. |
| 2ipi | 1329.37 | 1.7 | 1,2 | SEC                   | 17395717               | Monomer following <a href="#">publication</a> , they did SEC, no data shown. Four chains in the a.u., with two nearly identical large interfaces (B+A)                                                                                                                                                                                                                                                              |
| 3cj1 | 1124.4  | 1.7 | 1   | native PAGE, SEC, DLS | 17910474               | <a href="#">Brenda</a> assigns as dimer. <a href="#">17910474</a> claims monomer by native PAGE (data shown) SEC and dynamic light scattering (data not shown)                                                                                                                                                                                                                                                      |
| 2eyi | 1111.83 | 1.7 | 1   | DLS, SEC              | 12657793               | a-actinin binding domain, monomer, dimerization domain before, <a href="#">scheme</a>                                                                                                                                                                                                                                                                                                                               |
| 1pp3 | 1110.48 | 1.6 | 1   | SEC                   | DOI: 10.1021/cg800616q | Monomer by SEC                                                                                                                                                                                                                                                                                                                                                                                                      |
| 1ynq | 1101.76 | 1.3 | 1   |                       | 16242712               | Personal communication by XD Li                                                                                                                                                                                                                                                                                                                                                                                     |
| 2w20 | 1100.67 | 1.5 | 1   | SEC                   | 18765901               | Truncated version of protein, predominantly monomer, full length may be dimer.                                                                                                                                                                                                                                                                                                                                      |
| 3mg1 | 1099.32 | 1.6 | 1   | SEC                   | 20368334               | Authors say it is a monomer based on SEC, they show data and looks like well calibrated. Homolog (~70% seq id) <a href="#">1m98</a> has the same interface and the <a href="#">paper</a> says that it is a dimer based on SEC, but they don't show the data. Thus we call monomer following the first paper as they seem to have good data.                                                                         |
| 3cu9 | 1098.4  | 1.2 | 1   | SEC                   | 19505290               | Monomer by SEC, so the authors claim in the paper, without showing data. Originally the entry in the list was the mutant (from the same study) <a href="#">3d5y</a> but we replaced it by the wild type <a href="#">3cu9</a> . Both contain the same interface                                                                                                                                                      |
| 1n45 | 1097.6  | 1.5 | 1   | CCL, FRET             | 19556236               | Forms dimers/oligomers in ER, monomer when it does not have TM helix.                                                                                                                                                                                                                                                                                                                                               |
| 2hlq | 1087.36 | 1.5 | 1   | SEC                   | 17094948 16982201      | Seems monomeric following their very detailed paper ( <a href="#">16982201</a> ) on purification of this protein. They did SEC and show data (construct D 32-131 is the one used for crystallisation).                                                                                                                                                                                                              |
| 1s83 | 1063.55 | 1.3 | 1   | SEC                   | 19585993               | Monomeric, bovine pancreatic trypsin was used as a standard in SDS-PAGE.                                                                                                                                                                                                                                                                                                                                            |
| 3go5 | 1063.14 | 1.4 | 1   | SEC                   | 20399190               | Monomer claim the authors, by SEC but no data shown.                                                                                                                                                                                                                                                                                                                                                                |
| 3fwk | 1046.84 | 1.2 | 1   | SEC                   | 19375431               | Authors claim monomer by SEC. They show the data in <a href="#">supplementary material</a> (Fig. S1). Homolog <a href="#">2wsi</a> (~50% seq id and with very good structural conservation) does not have that interface.                                                                                                                                                                                           |
| 1gpi | 1039.54 | 1.3 | 1   |                       | 11743726               | Circumstantial evidence: crystal structure is truncated enzyme, additional residues for full length would disrupt interaction.                                                                                                                                                                                                                                                                                      |

|      |         |     |       |                              |                                   |                                                                                                                                                                                                                                                                                                                                             |
|------|---------|-----|-------|------------------------------|-----------------------------------|---------------------------------------------------------------------------------------------------------------------------------------------------------------------------------------------------------------------------------------------------------------------------------------------------------------------------------------------|
| 1lxx | 1033.37 | 1.5 | 1     | SEC                          | 9365                              | Monomer in Bacillus sp.                                                                                                                                                                                                                                                                                                                     |
| 2j0p | 1017.8  | 1.7 | 1     | SEC                          | 16943192                          | Authors claim monomer by SEC. They present the data (Fig. S2 of supplementary) and they really did a very good job: well calibrated, done at different protein and salt concentrations.                                                                                                                                                     |
| 1xgk | 1017.46 | 1.4 | 1     | SEC, DSC unfolding           | 11679757 15537757                 | Seems to be a monomer. Determined by SEC (11679757), some data given but no plots. Also main publication for this structure 15537757 claims monomer through DSC unfolding. (Note that the 2 names used for the species of this NmrA protein: Emericella nidulans and Aspergillus nidulans refer to the same fungal species, see wikipedia)  |
| 3gkj | 1014.66 | 1.6 | 1     | AUC (SV)                     | 19563754                          | Authors claim monomer by AUC. Previously supposed to be dimer (17989072) by SEC, but authors say that "Previous results with glycosylated proteins have shown anomalous migration behavior on size exclusion chromatography", that's why they did the AUC.                                                                                  |
| 3m66 | 1009.59 | 1.6 | 1     |                              | 9118945                           | MTERF3, binds as monomer to DNA, in 16787637 it is stated that it is a monomeric protein                                                                                                                                                                                                                                                    |
| 2wsa | 1007.3  | 1.6 | 1     |                              | 20036251                          | Authors state that it is monomeric. Brenda has orthologs characterized by SEC all monomeric.                                                                                                                                                                                                                                                |
| 3hzi | 1005.4  | 1.6 | 1     |                              | 17697998                          | Stated by the authors to exist as monomer in solution.                                                                                                                                                                                                                                                                                      |
| 1w9q | 1005.13 | 1.7 | 1     | NMR                          | 16533050 15698575                 | Contains not interesting peptidic ligand (chain S). The second paper 15698575 is a full NMR study of the protein's quaternary structure.                                                                                                                                                                                                    |
| 3h30 | 1328.83 | 1.6 | 1,2,3 |                              | 11574463, 17084631                | Comparison with 1JWH shows that the dimerization of the CK2 reg. subunit is NOT that observed in 3h30 (heterotetramer, as confirmed by BRENDA). Thus, accepted                                                                                                                                                                              |
| 2wbf | 1323.25 | 1.6 | 1     | SEC                          | 13679369, 19591843                | Fragment of domain SERA5PE of protein SERA5 of Plasmodium Falciparum. Domain SERA5PE is monomer by SEC (13679369)                                                                                                                                                                                                                           |
| 2j46 | 1235.11 | 1.1 | 1,2   | SEC                          | doi:10.1016/S0167-4838(02)00287-X | Elutes as monomer                                                                                                                                                                                                                                                                                                                           |
| 3kk8 | 1233.14 | 1.7 | 1     | MALS                         | 20139983                          | Full length forms tetradecamer, kinase domain is monomer (MALS)                                                                                                                                                                                                                                                                             |
| 1ejd | 1227.05 | 1.6 | 1     | native PAGE                  | 1577165                           | Characterized as monomer                                                                                                                                                                                                                                                                                                                    |
| 3gvo | 1222.17 | 1.6 | 1     | SEC,DLS (for homologue, 79%) | 19372537 11303521                 | Mouse Pumilio-2 Puf Domain. High sequence identity with human (~90%) and drosophila (79%). For Drosophila (3h3d) shown to be monomer by SEC and DLS (11303521). The Drosophila structure (3h3d) is a different crystal form and doesn't have the interface. Human homologues are same crystal form as 3gvo with same interface (e.g. 1m8z). |

|      |         |     |   |                               |                                                                       |                                                                                                                                                                                                                                                                                                                              |
|------|---------|-----|---|-------------------------------|-----------------------------------------------------------------------|------------------------------------------------------------------------------------------------------------------------------------------------------------------------------------------------------------------------------------------------------------------------------------------------------------------------------|
| 1j96 | 1218.8  | 1.3 | 1 | SEC (homologue, 68%)          | 11514561                                                              | Not clear, according to BRENDA in <i>Rattus norvegicus</i> monomer by gel filtration (6435601). Seq id is 68%. Primary citation claims monomer in solution (data not shown). Keep                                                                                                                                            |
| 2xov | 1199.74 | 1.7 | 1 |                               | 21256137                                                              | Transmembrane protease, up and down arrangement, clearly a crystal contact                                                                                                                                                                                                                                                   |
| 1so7 | 1189.06 | 1.5 | 1 | SEC, disc gel electrophoresis | 6735353                                                               | Monomer by gel filtration and disc electrophoresis                                                                                                                                                                                                                                                                           |
| 2cki | 1185.89 | 1.7 | 1 | SEC                           | 16627477                                                              | Monomer, assessed by gel filtration                                                                                                                                                                                                                                                                                          |
| 1lqt | 1180.32 | 1.1 | 1 | SEC                           | 12071965                                                              | Monomer, assessed by gel filtration                                                                                                                                                                                                                                                                                          |
| 2ow9 | 1178.46 | 1.7 | 1 | SEC                           | 17623656, 9790892                                                     | Literature found in MEROPS. Same sequence with similar boundaries analyzed by gel-filtration: monomer                                                                                                                                                                                                                        |
| 2f37 | 1158.58 | 1.7 | 1 | SEC                           | 16882997                                                              | Ankyrin repeat, monomer in solution, no data shown                                                                                                                                                                                                                                                                           |
| 2z6o | 1158.39 | 1.6 | 1 | NMR, SLS                      | 19101823                                                              | Ubiquitin protein ligase, monomeric as stated in 19101823 by SLS (data not shown) and rotational tumbling correlation time in NMR.                                                                                                                                                                                           |
| 1ueb | 1150.1  | 1.7 | 1 | AUC, LS                       | 15210970                                                              | Monomer by AUC and light scattering                                                                                                                                                                                                                                                                                          |
| 3b37 | 1148.82 | 1.7 | 1 | SEC                           | ISSN: 0002-1369 (AGRICULTURAL AND BIOLOGICAL CHEMISTRY, 1988, 52:217) | Monomer by SEC                                                                                                                                                                                                                                                                                                               |
| 1wly | 1143.41 | 1.3 | 1 | SEC                           | 15781461                                                              | Monomer by SEC (stated in 15781461). However E. coli homolog 1qor (~40%id and very well conserved structurally) has exactly the same interface and they claim it is a dimer in the paper without presenting much experimental evidence.                                                                                      |
| 1lf2 | 2171.42 | 1.8 | 1 | SEC, AUC                      | 12454457 17040901                                                     | EC 3.4.23.39. Interesting case: dimer in several crystal forms, monomer in solution under the conditions where protein is active, but higher oligomers can form irreversibly. Keep.                                                                                                                                          |
| 2qb5 | 1790.2  | 1.8 | 1 | SEC, SLS, comparison to 2odt  | 17616525                                                              | Authors claim monomer in paper from SEC and SLS but data not shown. There's a HIS tag in the N terminal which is involved slightly in the interface. But most of the interface is formed by the C-terminal. Comparing to same structure but different construct 2odt from SGC, that one does not have this interface at all. |
| 1zfq | 1678.52 | 1.8 | 1 | SEC, AUC                      | 7867647 12960164                                                      | Was characterized as monomer in earlier publication 7867647 by SEC, data not shown. Then by AUC in this other paper 12960164 (reference of structure 1uiu). Also comparing to same protein 1uiu (first structure solved for this NikA protein), the interface is not present in that one.                                    |

|      |         |     |   |                |                                               |                                                                                                                                                                                                                                                                                                                                                                                                                                                                                                            |
|------|---------|-----|---|----------------|-----------------------------------------------|------------------------------------------------------------------------------------------------------------------------------------------------------------------------------------------------------------------------------------------------------------------------------------------------------------------------------------------------------------------------------------------------------------------------------------------------------------------------------------------------------------|
| 2yvw | 1522.84 | 1.8 | 1 | SEC            | 1577165                                       | SG. There's not much info about this Aquifex aeolicus MurA enzyme, but there are a few very well structurally conserved (~40% seq id, ~1A rmsd) homologs from E. coli, E. cloacae and others. They all seem to be monomers following Brenda. This early paper <a href="#">1577165</a> shows evidence for E. cloacae ( <a href="#">3kqa</a> ) being a monomer by SEC. The various homologs have different crystal forms and none of the others have this interface. Thus monomer.                           |
| 1d3h | 1483.64 | 1.8 | 1 | SEC            | 10673429                                      | Authors state in paper that it is a monomer by analytical gel filtration chromatography. This is human DHODH enzyme, the structurally closely related homolog from Lactococcus Lactis ( <a href="#">1jue</a> ) is a homodimer, the dimerization interface of that one is different from this one                                                                                                                                                                                                           |
| 2e1v | 1653.41 | 1.8 | 1 | SEC            | 17383962                                      | Authors state that it is monomeric by gel filtration.                                                                                                                                                                                                                                                                                                                                                                                                                                                      |
| 3n5c | 1457.8  | 1.8 | 1 | SAXS, SEC-MALS | 20709080                                      | The authors do analysis by SAXS and by SEC-MALS presenting data and a lot of evidence. This seems to be a very clear monomer.                                                                                                                                                                                                                                                                                                                                                                              |
| 2wbn | 1439.53 | 1.8 | 1 | AUC            | 19454024                                      | No data shown for sedimentation equilibrium experiment. Authors state "no dimer has been observed for any of the available structures of afSBDS, which show different crystal packings."                                                                                                                                                                                                                                                                                                                   |
| 3c1d | 1427.07 | 1.8 | 1 | AUC, SEC, CL   | 18650935                                      | Sedimentation velocity (data shown), homo-bifunctional chemical crosslinking (not shown)                                                                                                                                                                                                                                                                                                                                                                                                                   |
| 1ndb | 1386.57 | 1.8 | 1 | SEC            | 12526798                                      | SEC, data not shown. Consistent with publication by <a href="#">Ramsay</a>                                                                                                                                                                                                                                                                                                                                                                                                                                 |
| 2x26 | 1377.16 | 1.8 | 1 | SEC            | 20383006                                      | Interesting interaction: as in fim proteins there is a 13-amino-acid tail (but C-terminal) that folds within the cleft of the next monomer (cloning artifact: coupling of protein to GFP for estimation of expression levels). Protein runs as monomer in SEC (data not shown). No homologs in PDB                                                                                                                                                                                                         |
| 3kh7 | 1333.8  | 1.8 | 1 |                | 20544959                                      | Most likely monomer, though no data provided. Homolog from E.coli is monomer <a href="#">11843181</a> , rmsd between 3kh7 (pa) and 2b1k (ec) 0.95 A                                                                                                                                                                                                                                                                                                                                                        |
| 1toa | 1294.51 | 1.8 | 1 | SEC            | 10404217, 10400603                            | Monomer by SEC                                                                                                                                                                                                                                                                                                                                                                                                                                                                                             |
| 1ffr | 1226.41 | 1.8 | 1 | SEC            | Annals of Microbiology, 55 (3) 213-218 (2005) | Chitinase from S. Marcenses (bacterium), uniprot P07254. It's identical in sequence to Sanguibacter C4's chitinase (uniprot Q2V9S9) and that one is monomer by SEC with data (Tao YONG, Jin HONG, Long ZHANGFU, Zhang LI, Ding XIUQIONG, Tao KE, Ge SHAORONG, Liu SHIGUI, Annals of Microbiology, 55 (3) 213-218 (2005), Purification and characterization of an extracellular chitinase produced by bacterium C4) ( <a href="#">link to pdf</a> ). Brenda also has many monomers for bacterial chitinases |
| 1vqq | 1215.7  | 1.8 | 1 | SEC            | 8163510                                       | Seems to be monomeric by SEC                                                                                                                                                                                                                                                                                                                                                                                                                                                                               |

|      |         |     |   |                                                      |                     |                                                                                                                                                                                                     |
|------|---------|-----|---|------------------------------------------------------|---------------------|-----------------------------------------------------------------------------------------------------------------------------------------------------------------------------------------------------|
| 1n4g | 1162.15 | 1.8 | 1 | MALLS                                                | 20621636            | CYP121, it's monomer                                                                                                                                                                                |
| 3ita | 1142.07 | 1.8 | 1 | native PAGE                                          | 19807181            | Publication claims that PBP6 behaves as monomer in solution                                                                                                                                         |
| 1woq | 1129.82 | 1.8 | 1 | SEC                                                  | 12839753            | 15377666 publication claims monomer, evidence given in 12839753                                                                                                                                     |
| 1cqx | 1110.84 | 1.8 | 1 | SEC                                                  | 8557026, 218634     | Authors claim structure to be monomeric but no evidence given. See 218634 for clear SEC evidence.                                                                                                   |
| 2eqa | 1105.25 | 1.8 | 1 | LS                                                   | 18004774            | As described in publication                                                                                                                                                                         |
| 3mhj | 1102.84 | 1.8 | 1 | SEC                                                  | 18436240            | Human tankyrase 2, most likely monomer by comparison with tankyrase 1 2RF5 (evidence for tankyrase 1 given in 18436240), sequence identity is about 72%                                             |
| 2fgz | 1091.03 | 1.8 | 1 | Homology                                             | 16650854            | Crystal Structure Analysis of apo pullulanase from Klebsiella pneumoniae, monomer in Klebsiella aerogenes (seq id 85%)                                                                              |
| 1fpo | 1087.78 | 1.8 | 1 | SEC                                                  | 9144776             | Protein seems larger than monomer, but smaller than dimer. interpreted as non-globular by authors. It makes sense if compared to structure                                                          |
| 3lvd | 1082.92 | 1.8 | 1 | SEC                                                  | 20220148 12693991   | Green fluorescent protein mutant (aceGFP-G222E), wt is monomer by SEC; since G222E does not affect interface, accept                                                                                |
| 3irb | 1060.05 | 1.8 | 1 | SLS, SEC                                             | 20944206            | PISA seems to predict 2mer or 4mer, experiments seem to tell otherwise, no data shown                                                                                                               |
| 1utj | 1057.15 | 1.8 | 1 | SEC                                                  | 8896331             | Trypsin of Salmo, SEC mentioned in publication                                                                                                                                                      |
| 3f0o | 1043.2  | 1.8 | 1 | SEC                                                  | 3542021             | Monomer in solution, but crystal interface looks quite real                                                                                                                                         |
| 2h44 | 1038.64 | 1.8 | 1 | SEC                                                  | 16735511            | Monomeric fragment (535-860). SEC was done on 508-865, the full-length protein is dimeric                                                                                                           |
| 1t8g | 1029.16 | 1.8 | 1 | SEC                                                  | 15340171            | Phage T4 lysozyme mutant L32A/L33A/T34A/C54T/C97A/E108V. Lysozyme is a monomer and the author state that "soluble and monomeric as judged by elution profiles from sizing columns (data not shown)" |
| 1g6a | 1019.59 | 1.8 | 1 | SEC                                                  | 11148033, 235307    | PSE-4 beta-lactamase, monomer by SEC (the authors quote an early paper where there is a calibrated SEC)                                                                                             |
| 2zyr | 1009.28 | 1.8 | 1 | SEC, active site titration with [3H]DFP, native PAGE | 19447113,, 10620337 | AFL from <i>Archeoglobus fulgidus</i> . Crystallizes also in a form with only one monomer per a.u. (2zys), shares interface with 2zyr. Monomeric as determined by previous biochemical study        |
| 3els | 1005.04 | 1.8 | 1 | SEC                                                  | 19010333            | Clear chromatogram with calibration, monomer                                                                                                                                                        |

## Supplementary Table 2: DCbio dataset

| entry | area    | resolution | assembly | bio interfaces | evidence             | reference                                            | comments                                                                                                                                                                                                                                                                                                                                                                                                                                                                                                                                                                                                                                                          |
|-------|---------|------------|----------|----------------|----------------------|------------------------------------------------------|-------------------------------------------------------------------------------------------------------------------------------------------------------------------------------------------------------------------------------------------------------------------------------------------------------------------------------------------------------------------------------------------------------------------------------------------------------------------------------------------------------------------------------------------------------------------------------------------------------------------------------------------------------------------|
| 2fwv  | 2085.26 | 1.7        | 2        | 1              | DLS, SEC             | <a href="#">17172346</a>                             | It's a dimer, wrongly annotated as monomer. They check it with several methods in the <a href="#">paper</a> : DLS, SEC (showing data for both) and homology. PISA predicts wrongly a tetramer as the most likely assembly                                                                                                                                                                                                                                                                                                                                                                                                                                         |
| 1ytq  | 1950.11 | 1.7        | 2        | 1              | SEC, DLS             | <a href="#">17327390</a>                             | It's a dimer, wrongly annotated as monomer. The abstract says it already and they show it in the paper with SEC and dynamic light scattering.                                                                                                                                                                                                                                                                                                                                                                                                                                                                                                                     |
| 1v2x  | 1705.29 | 1.5        | 2        | 1              | AUC                  | <a href="#">15062082</a>                             | It's a dimer, wrongly annotated as monomer. In paper they state they did AUC but don't show the data. Strangely the BSA they quote in the paper is 1353 A2 instead of our value (or PISA's) ~1700 A2.                                                                                                                                                                                                                                                                                                                                                                                                                                                             |
| 1pkh  | 1673.65 | 1.4        | 3        | 1,2            | SEC                  | <a href="#">12909016</a>                             | It's a hexamer, wrongly annotated as monomer. Clear from crystal and also proofed with SEC in paper. Actually it's a dimer of trimers. They proof in the paper that it's a hexamer and not a trimer with SEC, but it's not totally clear whether the hexamer is real (could be simply low affinity). As the 100% clear one is the trimer (interfaces 1,2) we'll take those 2 as bio, interface 4 would be the one corresponding to the dimer of trimers oligomerisation.                                                                                                                                                                                          |
| 1r5y  | 1554.08 | 1.2        | 2        | 1              | SEC, non-covalent MS | <a href="#">7665516</a><br><a href="#">19627989</a>  | Zymomonas mobilis (this one) was considered a monomer (SEC, data not shown), but a recent paper shows that it is a dimer by non-covalent MS and that it is the dimer that binds one substrate tRNA molecule at a time.                                                                                                                                                                                                                                                                                                                                                                                                                                            |
| 1kq3  | 1486.08 | 1.5        | 4        | 1,2            | SEC,EM,homology      | <a href="#">11566129</a><br><a href="#">11134946</a> | A tetramer. No publication (SG). But homolog 1jq5 is a tetramer (clearly stated in <a href="#">paper</a> with support from EM and SEC data). Identity is ~40% but structure is very well conserved. They both contain the same interface and furthermore they both crystallize in same space group (I 4 2 2). Actually there's a tetramer/octamer discussion for 1jq5, in <a href="#">11566129</a> they say an octmer fits the EM data but looks not so convincing, in <a href="#">11134946</a> there's SEC evidence for octamer, but they also mention an earlier paper which claims tetramer. Taking only interfaces 1,2 (tetramer) and not 3 (the octamer one) |
| 1jq5  | 1318.52 | 1.7        | 4        | 1,2            | SEC,EM               | <a href="#">11566129</a><br><a href="#">11134946</a> | See 1kq3 above.                                                                                                                                                                                                                                                                                                                                                                                                                                                                                                                                                                                                                                                   |
| 2h7i  | 1481.31 | 1.6        | 4        | 1,2            | SEC                  | <a href="#">17588773</a>                             | Tetramer. The protein has been solved many times (26 entries with 100% id in PDB). The paper from <a href="#">Zidz</a> explicitly says it's a homotetramer from SEC data (not showing data).                                                                                                                                                                                                                                                                                                                                                                                                                                                                      |
| 2nzl  | 1299.14 | 1.4        | 4        | 1              | SEC                  | <a href="#">17669354</a>                             | A tetramer. SEC evidence in this <a href="#">paper</a> found in reference of main paper of entry 2WOU (same protein as this one).                                                                                                                                                                                                                                                                                                                                                                                                                                                                                                                                 |
| 1uj6  | 1281.61 | 1.7        | 2        | 1              | SEC,DLC              | <a href="#">13679361</a>                             | Homodimer by SEC and DLC according to main reference of structure                                                                                                                                                                                                                                                                                                                                                                                                                                                                                                                                                                                                 |
| 1ju3  | 1268.31 | 1.6        | 2        | 1              | SEC                  | <a href="#">11742345</a><br><a href="#">20436035</a> | Dimer by SEC ( <a href="#">20436035</a> ). Main reference and PDB annotation say monomer                                                                                                                                                                                                                                                                                                                                                                                                                                                                                                                                                                          |
| 1sml  | 1258.8  | 1.7        | 4        | 1,2            | SEC,AUC              | <a href="#">9811546</a>                              | Wrong annotation: tetramer by SEC (older references from main paper) and AUC sedimentation equilibrium with data shown ( <a href="#">9811546</a> )                                                                                                                                                                                                                                                                                                                                                                                                                                                                                                                |
| 3fah  | 1240.29 | 1.7        | 2        | 1              | AUC,SEC              | <a href="#">8354279</a>                              | Wrong annotation, characterized as dimer.                                                                                                                                                                                                                                                                                                                                                                                                                                                                                                                                                                                                                         |
| 1lzl  | 1207.56 | 1.3        | 2        | 1              | SEC                  | <a href="#">12421810</a>                             | Dimer by SEC                                                                                                                                                                                                                                                                                                                                                                                                                                                                                                                                                                                                                                                      |
| 3iue  | 1150.47 | 1.7        | 2        | 1              | SEC                  | <a href="#">11669627</a>                             | Dimer by SEC in <a href="#">11669627</a>                                                                                                                                                                                                                                                                                                                                                                                                                                                                                                                                                                                                                          |

|      |         |     |   |   |                               |                      |                                                                                                                                                                                                                                                                                                                                                                                                                             |
|------|---------|-----|---|---|-------------------------------|----------------------|-----------------------------------------------------------------------------------------------------------------------------------------------------------------------------------------------------------------------------------------------------------------------------------------------------------------------------------------------------------------------------------------------------------------------------|
| 1vk5 | 1144.85 | 1.6 | 2 | 1 | SEC                           | 16511118             | "Gel filtration indicates homodimer" (data not shown)                                                                                                                                                                                                                                                                                                                                                                       |
| 2exb | 1899.64 | 1.8 | 2 | 1 | AUC                           | 16411754             | Dimer, the paper says that "it forms a tightly bound dimer" from AUC analysis (sedimentation and equilibrium), but data not shown.                                                                                                                                                                                                                                                                                          |
| 3a2q | 1745.79 | 1.8 | 2 | 1 | SEC,AUC                       | 923591               | It's a homodimer by SEC and AUC, see <a href="#">923591</a>                                                                                                                                                                                                                                                                                                                                                                 |
| 3h6d | 1665.4  | 1.8 | 3 | 1 |                               |                      | It's a homotrimer. Couldn't find the citation with the exact experimental evidence, but it is assumed by all authors that it is known to be a trimer. There are 10 structures for this protein in the PDB. All showing the trimer, e.g. 1snf which is also a different crystal form                                                                                                                                         |
| 1s2z | 1621.4  | 1.8 | 2 | 1 | AUC                           | 2835096              | It's a homodimer by AUC. Has 2 large (>1500A <sup>2</sup> ) interfaces. Both are in all 10 structures for this protein in PDB, all of them same crystal form though (see protcid)                                                                                                                                                                                                                                           |
| 2z1n | 1586.77 | 1.8 | 2 | 1 | SEC                           | 18175326             | Dimer or tetramer by gel filtration (data not shown). Actually there are 2 different interfaces that form 2 possible dimers and altogether a possible tetramer. The gel filtration gives a ratio 10:1 dimer to tetramer. But it's not known which one of the 2 interfaces is the possible dimer observed. We take only interface 1 as a sure bio to stay in the safe side                                                   |
| 2vef | 1556.35 | 1.8 | 2 | 1 | SEC                           | 3114239              | Dimer by gel filtration, see <a href="#">3114239</a> . Other homologs from similar organisms (e.g. 1eye from M.Tuberculosis) superpose well, have same interface and are known to be dimers, see <a href="#">11007651</a>                                                                                                                                                                                                   |
| 1bs1 | 1483.09 | 1.8 | 2 | 1 | SEC                           | 4921568              | Was earlier characterized as homodimer. It's been solved many times and all the structures in the PDB have the same interface                                                                                                                                                                                                                                                                                               |
| 3lw6 | 1010.95 | 1.8 | 2 | 1 | SEC,UDP binding stoichiometry | 20236943<br>19032152 | Catalytic domain of Drosophila beta1,4-galactosyltransferase-7 (73% similarity to human). For human enzyme (delta 1-81) gel filtration and UDP binding stoichiometry show it is a dimer. Interestingly this entry (Drosophila) contains quite a long N-terminal expression tag taken from the homologous bovine enzyme. Anyway the tag is not even seen in the density and in any case doesn't come close to the interface. |
| 3f3e | 1270.99 | 1.8 | 2 | 1 | analogy to serotonin receptor | 16041361             | Dimer according to <a href="#">16041361</a>                                                                                                                                                                                                                                                                                                                                                                                 |
| 2vr4 | 1265.02 | 1.8 | 2 | 1 | SEC,DLS                       | 17287210             | Dimer by SEC and DLC data not shown, reference is of same protein solved earlier by same group ( <a href="#">2je8</a> ). Brenda has dimer or higher oligomer for same EC (3.2.1.25) in related organisms                                                                                                                                                                                                                    |
| 1x7v | 1191.21 | 1.8 | 2 | 1 | SEC                           | 16049913             | "The PA3566 protein crystallizes as a trimer, although the functional unit is most likely a dimer, as are other members of this structural superfamily." confirmed by SEC                                                                                                                                                                                                                                                   |
| 1f2d | 1892.91 | 2.0 | 2 | 1 |                               | 15189147             | PLP enzyme, known to be dimer or higher oligomer, see review <a href="#">15189147</a> by Eliot and Kirsch                                                                                                                                                                                                                                                                                                                   |
| 1lw4 | 1857.20 | 1.9 | 2 | 1 |                               | 15189147             | PLP enzyme, known to be dimer or higher oligomer, see review <a href="#">15189147</a> by Eliot and Kirsch                                                                                                                                                                                                                                                                                                                   |
| 1n8p | 1969.27 | 2.6 | 2 | 1 |                               | 15189147             | PLP enzyme, known to be dimer or higher oligomer, see review <a href="#">15189147</a> by Eliot and Kirsch                                                                                                                                                                                                                                                                                                                   |
| 1qop | 1531.10 | 1.4 | 2 | 1 |                               | 15189147             | PLP enzyme, known to be dimer or higher oligomer, see review <a href="#">15189147</a> by Eliot and Kirsch                                                                                                                                                                                                                                                                                                                   |
| 2aq6 | 1195.11 | 1.7 | 2 | 1 |                               | 15189147             | PLP enzyme, known to be dimer or higher oligomer, see review <a href="#">15189147</a> by Eliot and Kirsch                                                                                                                                                                                                                                                                                                                   |



|      |                    |      |    |     |                 |                    |                                                                                                                                                                                                                                                                                                                                                                                                                                                                                                                                              |
|------|--------------------|------|----|-----|-----------------|--------------------|----------------------------------------------------------------------------------------------------------------------------------------------------------------------------------------------------------------------------------------------------------------------------------------------------------------------------------------------------------------------------------------------------------------------------------------------------------------------------------------------------------------------------------------------|
| 2bhs | 1487.99            | 2.7  | 2  | 1   |                 | 15189147           | PLP enzyme, known to be dimer or higher oligomer, see review <a href="#">15189147</a> by Eliot and Kirsch                                                                                                                                                                                                                                                                                                                                                                                                                                    |
| 2cft | 944.77             | 1.8  | 2  | 1   |                 | 15189147           | PLP enzyme, known to be dimer or higher oligomer, see review <a href="#">15189147</a> by Eliot and Kirsch                                                                                                                                                                                                                                                                                                                                                                                                                                    |
| 2e7j | 1668.16            | 2.4  | 2  | 1   |                 | 15189147           | PLP enzyme, known to be dimer or higher oligomer, see review <a href="#">15189147</a> by Eliot and Kirsch                                                                                                                                                                                                                                                                                                                                                                                                                                    |
| 2ecq | 1623.08            | 1.9  | 2  | 1   |                 | 15189147           | PLP enzyme, known to be dimer or higher oligomer, see review <a href="#">15189147</a> by Eliot and Kirsch                                                                                                                                                                                                                                                                                                                                                                                                                                    |
| 2rkb | 1104.54            | 2.8  | 2  | 1   |                 | 15189147           | PLP enzyme, known to be dimer or higher oligomer, see review <a href="#">15189147</a> by Eliot and Kirsch                                                                                                                                                                                                                                                                                                                                                                                                                                    |
| 1eej | 856.37             | 1.90 | 2  | 1   | SEC             | 7536035            | Well characterized as homodimer, see <a href="#">7536035</a> .                                                                                                                                                                                                                                                                                                                                                                                                                                                                               |
| 1o17 | 933.97             | 2.05 | 2  | 1,2 | SEC             | 11298741           | Well characterized as homodimer, see <a href="#">11298741</a> . Two copies of the interface in the ASU.                                                                                                                                                                                                                                                                                                                                                                                                                                      |
| 1ze3 | 1473.17<br>1093.65 | 1.84 | 3  | 1,2 | SEC             | 15920478           | Ternary complex of FimD-C-H. Characterized as complex by SEC                                                                                                                                                                                                                                                                                                                                                                                                                                                                                 |
| 3d36 | 665                | 2.03 | 4  | 1,3 | Mutagenesis     | 19101565           | Well characterized complex (on interface 3) of KinB (chains A,B) and small protein Sda (chain C). Interface 1 is for homodimer A+B. Interface 2 is really interesting because it is a crystal contact that replaces the bio contact of interface 3 in the other (symmetric) side of the molecule. The paper is very thorough and they check the interface with different techniques, including mutagenesis.                                                                                                                                  |
| 3r0n | 901.84             | 1.3  | 2  | 1   | SEC,Native PAGE | 22547693           | Immunoglobulin variable domain of Nectin-2. The reference is the primary citation of same protein <a href="#">4dfh</a>                                                                                                                                                                                                                                                                                                                                                                                                                       |
| 3da8 | 911.22             | 1.3  | 2  | 1   | DLS,SEC         | 19394344           | Authors did both DLS and SEC but show no data, they solved 2 structures for the same protein in different crystal forms, both have the interface providing further evidence.                                                                                                                                                                                                                                                                                                                                                                 |
| 2c4w | 914.5              | 1.6  | 12 | 1,2 | AUC             | 1554351            | Type II DHQase from H. Pylori. It's a dodecamer by similarity to <a href="#">2y71</a> (M. Tuberculosis, only 30% seq id but amazing structural conservation at the dodecamer level, pymol aligns the 2 dodecamers downloaded from PISA with 1.4 rmsd) and to <a href="#">1gu0</a> (35%id, very good structural conservation at dodecameric level). <a href="#">2y71</a> and <a href="#">1gu0</a> have been well characterized biophysically ( <a href="#">1554351</a> ) as dodecamers. Interfaces 1 and 2 are engaged to form the dodecamer. |
| 3jrz | 933.25             | 1.7  | 2  | 1   | NMR             | 19959472           | They solved both the crystal and the NMR. In the abstract they say that it is a dimer in solution, but the only proof of it in the paper is from the NMR NOE peaks that are assigned to inter/intra molecular ones via the X-ray structure. Additional clues: 1) 2 crystal forms solved have the same interface, 2) a well conserved homolog of E coli <a href="#">3hpw</a> (~40%id) also has the same interface                                                                                                                             |
| 3f6q | 949.99             | 1.6  | 2  | 1   | SEC             | 19074270           | Citing the paper: "the complex remained intact through further rounds of ion-exchange and size-exclusion chromatography". They also tried mutagenesis on several residues, especially mutant F42A caused near complete loss of binding. By the way, the F42 is the only core residue in that side of the interface                                                                                                                                                                                                                           |
| 2wxd | 960.02             | 1.6  | 2  | 1   | SEC,AUC         | 2369130<br>9195886 | Well charaterized dimer, original reference is <a href="#">2369130</a> . Solved a few times in the PDB.                                                                                                                                                                                                                                                                                                                                                                                                                                      |
| 2bz6 | 981                | 1.6  |    |     |                 | 16621574           | FACTOR VIIA heavy and light chain linked by S-S bridge. The original single chain is cleaved by other factors of the extrinsic blood coagulation pathway into the heavy and light chain (P70375 UniProt)                                                                                                                                                                                                                                                                                                                                     |

|      |         |     |   |   |                                                                                           |                      |                                                                                                                                                                                                                                                                                              |
|------|---------|-----|---|---|-------------------------------------------------------------------------------------------|----------------------|----------------------------------------------------------------------------------------------------------------------------------------------------------------------------------------------------------------------------------------------------------------------------------------------|
| 2d0d | 1003.06 | 1.7 | 2 | 1 | SEC                                                                                       | 16233251             | Homodimer by SEC. This is a mutant but I couldn't find the WT, there are a few other mutants in PDB. In any case the mutation is not in interface.                                                                                                                                           |
| 3cm3 | 1012.27 | 1.3 | 2 | 1 | AUC-SV                                                                                    | 19211553             | Homodimer by AUC - sedimentation velocity, they show data.                                                                                                                                                                                                                                   |
| 3o1n | 1017.98 | 1   | 2 | 1 | SEC                                                                                       | 21291284<br>8216229  | AroD from <i>Salmonella enterica serovar typhimurium</i> ; AroD from <i>Salmonella typhi</i> , 100% id, is dimer by SEC (8216229)                                                                                                                                                            |
| 3h0n | 1018.4  | 1.5 | 2 | 1 | SEC,SLS                                                                                   | 20944211             | SG, new fold (ABATE domain), published.                                                                                                                                                                                                                                                      |
| 2v52 | 1030.07 | 1.5 | 2 | 1 | fluorescence anisotropy                                                                   | 19008859             | MAL-RPEL2, Kd by fluorescence anisotropy 0.1 uM.                                                                                                                                                                                                                                             |
| 1zlh | 1033.56 | 1.7 | 2 | 1 | inhibition kinetics, titration                                                            | 15961103<br>15561703 | Heterocomplex carboxypeptidase A1:proteinaceous inhibitor. It binds 1:1 (titration) with Ki ~ 1nM                                                                                                                                                                                            |
| 2dvn | 1045.17 | 1.6 | 2 | 1 | DLS                                                                                       | 18062990             |                                                                                                                                                                                                                                                                                              |
| 3ovp | 1060.91 | 1.7 | 2 | 1 | SEC, AUC                                                                                  | 20923965             |                                                                                                                                                                                                                                                                                              |
| 2i7d | 1077.94 | 1.2 | 2 | 1 | SEC                                                                                       | 2157703              | The main reference for this entry is 17985935                                                                                                                                                                                                                                                |
| 3bzl | 1085.28 | 1.2 | 2 | 1 | Dimer because the two chains originate from a self-cleaved protein which retains its fold | 18451864             | Special case: this C-terminal domain of the EscU protein from the type III secretion system of Gram-negative bacteria self-cleaves into two polypeptides and the two chains stay together. Originally the entry we had from the filtering was 3bzy, but it is a mutant, wt is 3BZL (1.71 A). |
| 2car | 1099.46 | 1.1 | 2 | 1 | SEC                                                                                       | 17138556<br>11278832 | Clear dimer by SEC, they show the calibration curve                                                                                                                                                                                                                                          |
| 3gus | 1221.37 | 1.5 | 2 | 1 |                                                                                           | 16597834<br>16399376 | Very well studied human glutathione S-transferase enzyme (2.5.1.18) type p1, standard name hGSTP1-1. Known to be homodimeric, could not find the exact reference. Many structures in PDB, all having the interface.                                                                          |
| 3jyo | 1224.52 | 1   | 2 | 1 | SEC                                                                                       | 18566515             | Homodimer by SEC                                                                                                                                                                                                                                                                             |
| 1uz3 | 1228.26 | 1.1 | 2 | 1 | SEC,AUC                                                                                   | 15978617             | N-terminal domain of EMSY protein (Q7Z589), homodimer in solution by SEC, AUC and even yeast two-hybrid evidence. Kd established at ~2uM                                                                                                                                                     |
| 2wtm | 1243.68 | 1.6 | 2 | 1 | DLS                                                                                       | 20058325             | Homodimer in solution by DLS. They solved 2 different crystal forms of the protein, both containing the interface.                                                                                                                                                                           |
| 2a5l | 1252.84 | 1.7 | 2 | 1 | AUC,SEC                                                                                   | 16322580<br>9694845  | Dimer-tetramer equilibrium, we take thus the 1st interface as valid (corresponding hopefully to dimer). Another structure within 95% id has been solved: 1zwl. Both have in common interfaces 1 and 2 and are 2 different crystal forms.                                                     |
| 2y39 | 1294.51 | 1.4 | 2 | 1 | SEC,AUC,NMR                                                                               | 18825506             | A homodimer by SEC, AUC and NMR. 3epv is the same protein with same interface except that it is slightly bigger, maybe because of different bound metal? In any case the evidence looks quite solid.                                                                                         |
| 2ab0 | 1296.42 | 1.1 | 2 | 1 | DLS                                                                                       | 16181642             | Protein YajL from E coli, dimer by DLS and homology to structurally very close human protein DJ-1 (1p5f)                                                                                                                                                                                     |
| 3epw | 1302.63 | 1.3 | 2 | 1 | SEC                                                                                       | 11292348             | Homodimer by SEC. Solved a few times in PDB. Reference is from first one 1hoz, which lacks part of a helix in the interface (missing density I guess), resulting in a much smaller area for the interface.                                                                                   |
| 2g2u | 1304.7  | 1.6 | 2 | 1 |                                                                                           | 21294157<br>16809340 | Well studied complex of SHV-1 + BLIP. Kds have been measured for WT (2uM) and mutants. We had originally the mutant 3n4i and I have replaced it by the WT 2g2u.                                                                                                                              |

|                      |         |     |   |   |               |                          |                                                                                                                                                                                                         |
|----------------------|---------|-----|---|---|---------------|--------------------------|---------------------------------------------------------------------------------------------------------------------------------------------------------------------------------------------------------|
| <a href="#">2vvt</a> | 1340.2  | 1.7 | 2 | 1 | MALS,AUC      | <a href="#">17568739</a> | Homodimer in solution, from MALS and AUC. They did a thorough study on this and many related homologs from other bacteria, characterizing and crystallizing all of them. Seems very clear               |
| <a href="#">1p5f</a> | 1343.76 | 1.1 | 2 | 1 | SEC           | <a href="#">12855764</a> | Well characterized human DJ-1 protein. We have a homolog in this list (2ab0). They did SEC and show data. We originally had a mutant in the list (2rk3), I've replaced it by WT 1p5f at 1.1A resolution |
| <a href="#">3itf</a> | 1359.9  | 1.5 | 2 | 1 | SEC,SGS       | <a href="#">21239493</a> | Homodimer by SEC and Sucrose Gradient Sedimentation, through them they determine a mass of 31KDa. All data shown                                                                                        |
| <a href="#">3kd2</a> | 1371.5  | 1.8 | 2 | 1 | SEC,AUC-SV    | <a href="#">20118260</a> | Homodimer by SEC, AUC-SV, showing data, looks solid. Originally we had mutant 3kda in the list, replaced by WT 3kd2, resolution 1.8                                                                     |
| <a href="#">2w6a</a> | 1394.15 | 1.4 | 2 | 1 | MALLS, AUC-SE | <a href="#">19136011</a> | Clear case                                                                                                                                                                                              |
| <a href="#">2y27</a> | 1395.2  | 1.6 | 2 | 1 | SEC           | <a href="#">21388965</a> | Clear case                                                                                                                                                                                              |
